# Supplementary material
Source: MDPI journal article supplement (https://www.mdpi.com/2673-6284/12/1/18)

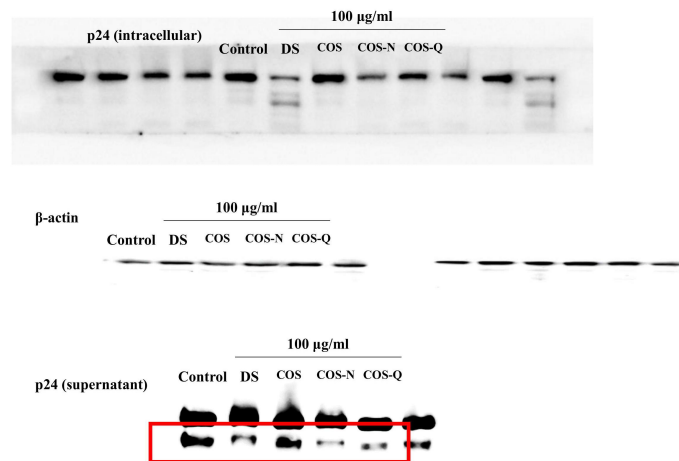

**Figure S1.** Original Western blot images.

Supplement: s1 [file s1]
